# Early Evidence of Effectiveness of Digital Contact Tracing for SARS-CoV-2 in Switzerland

Marcel Salathé, Christian L. Althaus, Nanina Anderegg, Daniele Antonioli, Tala Ballouz,  
Edouard Bugnion, Srdjan Čapkun, Dennis Jackson, Sang-Il Kim, James R. Larus, Nicola  
Low, Wouter Lueks, Dominik Menges, Cédric Moullet, Mathias Payer, Julien Riou, Theresa  
Stadler, Carmela Troncoso, Effy Vayena, Viktor von Wyl

All authors contributed equally.

Correspondence: marcel.salathe@epfl.ch, viktor.vonwyl@uzh.ch

## Affiliations:

MS: Digital Epidemiology Lab, Global Health Institute, School of Life Sciences, EPFL, Geneva,  
Switzerland

CA: Institute of Social and Preventive Medicine, University of Bern, Bern, Switzerland; Interfaculty  
Platform for Data and Computational Science (INPUT), University of Bern, Bern, Switzerland.

NA, JR: Institute of Social and Preventive Medicine, University of Bern, Bern, Switzerland; Division of  
infectious diseases, Federal Office of Public Health, Liebefeld, Switzerland

DA, EB, JRL, WL, MP, TS, CT, MS: School of Computer and Communication Sciences, EPFL, Switzerland

S-IK: Federal Office of Public Health, Liebefeld, Switzerland

SC, DJ: Department of Computer Science, ETH Zurich, Switzerland

NL: Institute of Social and Preventive Medicine, University of Bern, Bern, Switzerland

VW: Digital and Mobile Health Group, Epidemiology, Biostatistics & Prevention Institute, University of Zurich, Zurich, Switzerland

TB, DM: Epidemiology, Biostatistics & Prevention Institute, University of Zurich, Zurich, Switzerland

EV: Department of Health Sciences and Technology, Health Ethics and Policy Laboratory, ETH Zurich, Switzerland

CM: Federal Office of Information Technology, Systems and Telecommunication, Bern, Switzerland

**In the wake of the pandemic of coronavirus disease 2019 (COVID-19), contact tracing has become a key element of strategies to control the spread of severe acute respiratory syndrome coronavirus 2019 (SARS-CoV-2). Given the rapid and intense spread of SARS-CoV-2, digital contact tracing has emerged as a potential complementary tool to support containment and mitigation efforts. Early modelling studies highlighted the potential of digital contact tracing to break transmission chains, and Google and Apple subsequently developed the Exposure Notification (EN) framework, making it available to the vast majority of smartphones. A growing number of governments have launched or announced EN-based contact tracing apps, but their effectiveness remains unknown. Here, we report early findings of the digital contact tracing app deployment in Switzerland. We demonstrate proof-of-principle that digital contact tracing reaches exposed contacts, who then test positive for SARS-CoV-2. This indicates that digital contact tracing is an effective complementary tool for controlling the spread of SARS-CoV-2. Continued technical improvement and international compatibility can further increase the efficacy, particularly also across country borders.**

Contact tracing is a key element of the response to the pandemic of coronavirus disease 2019 (COVID-19), caused by severe acute respiratory syndrome coronavirus 2019 (SARS-CoV-2). By August 30, 2020, nearly 25 million diagnosed cases and over 800,000 confirmed deaths had been recorded [1]. Contact tracing is part of a strategy of “test, trace, isolate and quarantine” (TTIQ), which aims to stop recently infected individuals from transmitting SARS-CoV-2 [2]. The capacity for transmission before the onset of symptoms and the short incubation period mean that contact tracing has to be fast to be effective [3,4]. While modelling results showed that rapid, digital contact tracing could be a critical tool for containment and mitigation efforts [5], early efforts to develop and deploy digital applications were hampered by critical limitations imposed by smartphone operating systems and concerns about confidentiality and data protection. The Exposure Notification (EN) framework, jointly developed by Google and Apple, addressed these limitations and enabled the implementation of digital contact tracing applications (apps) in which all proximity contact information, and any decision-making about whether or not to notify a user of an exposure, remain on a user’s device, rather than on the server of a central authority. This approach minimizes privacy risks [6], but the restriction of information to users’ devices means that data needed to evaluate the effectiveness of EN-based contact tracing apps have to be collected from different sources [7].

SwissCovid was the first EN-based contact tracing app launched by a governmental public health authority, initially as a pilot to a limited number of users, on May 25, 2020. On June 25, 2020 the application was made available to the general population. A growing number of governments have launched or announced EN-based contact tracing apps, but their

effectiveness remains unknown. The significance of evaluating the effectiveness of EN-based contact tracing systems was highlighted by the World Health Organization [8] and is considered an ethical requirement for the continued deployment of such systems [9]. Here, we report early findings of the SwissCovid deployment from July 23, 2020 to August 31, 2020 (hereafter referred to as the study period).

## **How does SwissCovid work?**

The technical details of the SwissCovid system are given in [10], but briefly, SwissCovid uses the EN framework (version 1.2) to estimate proximity between phones. Each phone generates a daily Temporary Exposure Key (TEK), from which fast rotating proximity identifiers (RPI) are derived and exchanged with neighboring phones via Bluetooth Low Energy (BLE) beacons. Upon confirmation of SARS-CoV-2 infection by reverse transcriptase polymerase chain reaction (RT-PCR) testing, authorized Swiss health professionals can generate a single-use validation code (Covidcode), which is provided to the user. The Covidcode is associated with the beginning of the contagious period, which was determined to start 2 days before onset of symptoms [11] for symptomatic patients, and on the day of the test for patients who are asymptomatic at the time of testing. Upon entering a valid Covidcode in the app, TEKs for the contagious period are transmitted from the user's phone to the computer server of the Swiss Federal Office of Public Health (FOPH). All SwissCovid apps regularly contact the server for uploaded TEKs and associated data, and compute the exposure risk for the previous 10 days. To ensure privacy, notifications are shown only on the phone and are not forwarded to a server. During the study period, the notification provided users with the last day of exposure, a reminder that they are

entitled to a free RT-PCR test, and directed them to a SwissCovid-specific hotline (number only shown upon notification).

The BLE beacons, used by SwissCovid to estimate whether two devices have been in close proximity to each other for a period of time, are radio signals, which attenuate with distance. The EN framework application programming interface (API) estimates the amount of time a device has been close enough to other devices of infected individuals, based on three different attenuation intervals. To identify attenuation levels that would best estimate proximity below 1.5 meters, attenuation levels for different controlled and real-life scenarios produced by different devices at different distances and orientation were measured, and subsequently corrected using the per-device calibration values provided by the EN framework. Per-device calibration values take into account varying antenna and chip characteristics that influence sending and receiving powers. These results informed the parameterization of the EN framework so that SwissCovid users are notified if they spent at least 15 minutes in close proximity (1.5 meters) to RT-PCR-confirmed cases.

## **Evaluation of privacy-preserving EN-based digital contact tracing**

Digital contract tracing is a new method, and it is therefore crucial to rapidly evaluate and continuously monitor its effectiveness in the field. Digital contact tracing apps aim to prevent secondary transmissions by warning exposed contacts as early as possible [7]. To be an effective intervention, several technical, behavioral and procedural conditions must be met [12] (Figure 1). The app must be used by both the infected index case and exposed contacts (Figure 1, row 1), the index case must enter the Covidcode following a positive RT-

PCR test (row 2), the exposed contacts must receive notifications (row 3), and the exposed contacts must respond to the warning in a timely fashion to prevent further transmission (rows 4 and 5). These conditions cannot be assessed directly via the app, due to the voluntary and decentralized nature of the system. Alternative indicators and data sources have therefore been developed or commissioned. In Switzerland, the Federal Statistical Office (FSO) monitors downloads and active use of SwissCovid and publicly releases the relevant number on a daily basis [13,14]. The FOPH updated the clinical registration form for RT-PCR-confirmed cases before the beginning of the study period, and included the SwissCovid app as an option for the reason for the test. In addition, several ongoing research studies collect information about app usage and notifications received on a monthly basis, e.g. Corona Immunitas [15], a nationwide Sars-CoV-2 seroprevalence study with digital follow-up surveys [16], and the COVID-19 Social Monitor (<https://csm.netlify.app>), a regular, longitudinal online-survey on social, economic, and behavioral aspects related to COVID-19, drawn from a representative panel for Switzerland. Furthermore, an ongoing cohort study embedded in contact tracing in the canton of Zurich [17], which enrolls RT-PCR-confirmed cases and their close contacts, investigates circumstances of transmissions and risk exposures to SARS-CoV-2, and collects data about use of the app.

### **Downloads and active use of the SwissCovid app**

To measure the number of app downloads and active apps, reliable monitoring is already in place (Figure 1, Box 1). By August 31, 2020, the SwissCovid app has been downloaded 2.31 million times, and the number of active apps per day has been estimated at 1.59 million

(Figure 2A). The number of active users corresponds to 18.5% of the Swiss population (8.6 million).

During the study period, the FOPH reported 8,522 confirmed SARS-CoV-2 cases. During the same time period, the FOPH issued 1,593 (18.7% of confirmed cases) Covidcodes and 1,054 (12.4% of confirmed cases, 66.2% of issued Covidcodes) of these Covidcodes were entered in the app by the users (Figure 1, Box 2; Figure 2B). While the decentralized nature makes it impossible to know how many notifications were subsequently generated, the entered Covidcodes triggered 874 phone calls to the SwissCovid hotline, thus providing evidence for actions undertaken by notified contacts (Figure 1, Box 3; Figure 2B).

The Zurich SARS-CoV-2 Cohort provides additional evidence for SwissCovid app use and notification response among RT-PCR-confirmed cases and their close contacts. From August 7, 2020 to August 28, 2020, this study recruited 96 cases out of 1227 (7.8%) individuals tested RT-PCR-positive in Zurich during the same period. Of the 96 recruited positive cases, 53 (54%) reported that they had used the SwissCovid app, of whom 48 entered the Covidcode in the app. Also, in a sample of 82 exposed close contacts of RT-PCR-confirmed cases from the same cohort, 60 of the 82 close contacts (73%) reported that they had used the SwissCovid app. Of those 60 app users, 23 (38%) received an app notification in addition to being identified by the classic contact tracing system.

## **Evidence for app users responding to notifications**

Routine public health surveillance data suggest that notified contacts seek SARS-CoV-2 testing (Figure 1, Box 4). Information on reason for RT-PCR testing has been collected during the study period and was available for 5,491 (64%) of the 8,522 confirmed cases. Among these, 4,426 reported symptoms compatible with COVID-19, 331 reported outbreak investigation, and 26 reported the SwissCovid app as the reason for the test (Figure 1, Box 5). As the information on the reason for the test was only complete for 64% of confirmed cases, the total number of cases that were tested because of the notification by the app is likely higher. To estimate this number, we applied multiple imputation by chained equation [18], accounting for the effect of age and sex on the probability of missing information. This approach yielded a total of 37 cases (95% CI: 29-48) reporting the SwissCovid app as the reason for testing over the period considered. These cases displayed a slightly younger age distribution but a similar sex distribution compared to cases reporting another reason for testing (Figure 2C).

### **Effectiveness of the SwissCovid app**

A key measure to quantify the effectiveness of contact tracing at identifying SARS-CoV-2 infections is the number of positive contacts per index case. This number depends on several factors, such as the number of contacts traced per index case and the overall dynamics of the epidemic. Two large studies of classic contact tracing for SARS-CoV-2 found 23 secondary cases in contacts of 100 index cases (0.23, 95% CI: 0.15-0.32) in Taiwan [19] and 2,169 positive cases in contacts of 5,706 index cases (0.38, 95% CI: 0.37-0.39) in South Korea [20]. To compare the effectiveness of the SwissCovid app to these classic contact tracing studies, we estimated the number of notified positive contacts using the



app per index case who entered a Covidcode using the formula  $\epsilon = n / (c\mu)$ , where  $n=37$  (95% CI: 29-48) is the imputed total number of confirmed cases that reported the SwissCovid app as the reason for the test,  $c=1,054$  is the number of entered Covidcodes, and  $\mu=18.5\%$  is the proportion of the Swiss population that are active users of the app. Hence, the term  $c\mu$  corresponds to the number of index cases entering Covidcodes scaled by the probability that their contacts use the SwissCovid app assuming a homogeneous distribution of the app coverage. We obtained  $\epsilon=0.19$  (95% CI: 0.15-0.25), which is in a similar range to the numbers from the classic contact tracing studies.

Several factors could affect the estimated effectiveness of the SwissCovid app. Due to clustering of app users, the calculated  $\epsilon$  could represent an upper estimate as the uptake of the SwissCovid app in contacts of app users might be higher than the average uptake in the Swiss population. Assuming  $\mu=73\%$ , which is the uptake of the app in contacts of RT-PCR-confirmed cases from the Zurich SARS-CoV-2 Cohort, we obtained  $\epsilon=0.05$  (95% CI: 0.04-0.06) as a lower estimate which would still represent a respectable effectiveness of the app at identifying SARS-CoV-2 infections in contacts of index cases. However, a number of factors can also contribute to an underestimate of  $\epsilon$ . First, confirmed cases might only report the presence of symptoms as the reason for the test even though they were notified by the app. Second, due to the decentralized and voluntary nature of SwissCovid, there may have been more notified contacts that got infected and self-isolated following the notification, but did not get tested, and are thus missing from the analysis. Third, reported numbers of RT-PCR-confirmed cases using the app for the study period might be slightly higher in reality due to time delays in reporting.

Reliable, continuous monitoring of app effectiveness indicators is still being improved. Also, citizen reports on social media (e.g. Twitter) have suggested multi-day delays in receiving Covidcodes following positive test results in some instances. Along the same lines, during the study period, only about two thirds of issued Covidcodes have been entered and triggered notifications (Figure 2B). Efforts to streamline procedures and app user interactions with local health authorities - i.e. a direct referral of notified hotline callers to the responsible local authorities - are underway. Our findings illustrate that digital contact tracing can be effective even with low uptake, as suggested by mathematical modeling [21]. Because app coverage affects both the number of index cases and their contacts, the total number of SARS-CoV-2 infections that could be identified through digital contact tracing scales with the square of the coverage and could substantially increase with higher uptake (Figure 2D).

In conclusion, based on the data collected during the initial deployment of the SwissCovid app, we argue that voluntary digital contact tracing can show similar effectiveness at identifying infected partners of index cases as classic contact tracing, provided that both the index case and the exposed contacts use the app. As the effectiveness of digital contact tracing crucially depends on a strong embedding into an efficient testing and contact tracing infrastructure on the ground, apps like SwissCovid represent a helpful complementary tool for controlling the spread of SARS-CoV-2. The strength of evidence for app effectiveness as summarized in Figure 1 illustrates that most indicators have reached at least a “proof-of-principle” stage. That is, the outcome of interest was observed

independently in two data sources in all important key indicators. There is, however, still room for improvement. Upcoming improvements in the EN API by Apple and Google will increase the precision in determining risk, and reduce delay in communicating it to users. International interoperability exchanges, planned for October 2020, will increase the effectiveness of the app, in particular in the countries bordering Switzerland. Speed is essential to the effectiveness of TTIQ strategies [4,5]. Reducing the time to quarantine for contacts, as a result of digital contact tracing, should provide an additional, important benefit to COVID-19 mitigation efforts.

## Acknowledgement

The authors would like to acknowledge the Swiss Federal Office of Public Health, the Federal Statistical Office, and the Federal Office of Information Technology, Systems and Telecommunication for their collaborative contributions which were essential for the development, deployment, and assessment of SwissCovid. We thank the epidemiology unit at the Federal Office of Public Health for the contributions in providing data and commenting on the results and conclusions. We would also like to thank the Cantonal Health Directorate Zurich for their support and collaboration in the conduct of the Zurich SARS-CoV-2 Cohort, as well as the Swiss School of Public Health and the Corona Immunitas program for contributing to the study with their structure and services.

## Funding

MS received funding from the European Union's Horizon 2020 research and innovation programme - project "Versatile emerging infectious disease observatory - forecasting,

254 nowcasting and tracking in a changing world (VEO)” (No. 874735). CA received funding from  
 255 the European Union’s Horizon 2020 research and innovation programme - project EpiPose  
 256 (No 101003688) and the Swiss National Science Foundation (grant 196046). NL received  
 257 funding from the European Union’s Horizon 2020 research and innovation programme -  
 258 project EpiPose (No 101003688) and the Swiss National Science Foundation (grant 176233).  
 259 TB, DM and VvW received funding from the Cantonal Health Directorate Zurich, the  
 260 Federal Office of Public Health, the University of Zurich Foundation Pandemic Fund and  
 261 the Fondation Les Mûrons for the Zurich SARS-CoV-2 Cohort. EPFL is receiving base  
 262 funding for both research and development of SwissCovid from the Fondation Botnar.

## FIGURES

|                                                                           | Early signal<br>(observed in single<br>data source) | Proof of principle<br>(observed in two<br>independent<br>data sources) | Reliable, valid<br>quantification<br>(regular monitoring<br>in place) | Target reached<br>(targets clearly<br>defined and met by<br>indicators) |
|---------------------------------------------------------------------------|-----------------------------------------------------|------------------------------------------------------------------------|-----------------------------------------------------------------------|-------------------------------------------------------------------------|
| 1) Apps are downloaded and active                                         |                                                     |                                                                        | Box 1: Regular monitoring through Federal Statistical Office          |                                                                         |
| 2) Covidcodes are issued upon PCR-positive test and entered               |                                                     |                                                                        | Box 2: Regular monitoring through Federal Statistical Office          |                                                                         |
| 3) Notifications are received by exposed persons                          |                                                     | Box 3: Reports from two independent population surveys                 |                                                                       |                                                                         |
| 4) Notifications lead to actions in exposed persons (testing, quarantine) |                                                     | Box 4: Mandatory reporting upon PCR+ test                              |                                                                       |                                                                         |
| 5) Actions lead to prevention of secondary transmission                   |                                                     | Box 5: Mandatory reporting upon PCR+ test; contact tracing study       |                                                                       |                                                                         |


  
 Accumulation of evidence

**Figure 1: Quality of evidence for SwissCovid app effectiveness.** Row labels: Necessary technical, procedural and behavioral conditions for digital contact tracing to be effective. Columns: Milestones in evidence accumulation. Green boxes indicate available data sources for evidence assessments; quantitative information related to green boxes are provided in the main text.

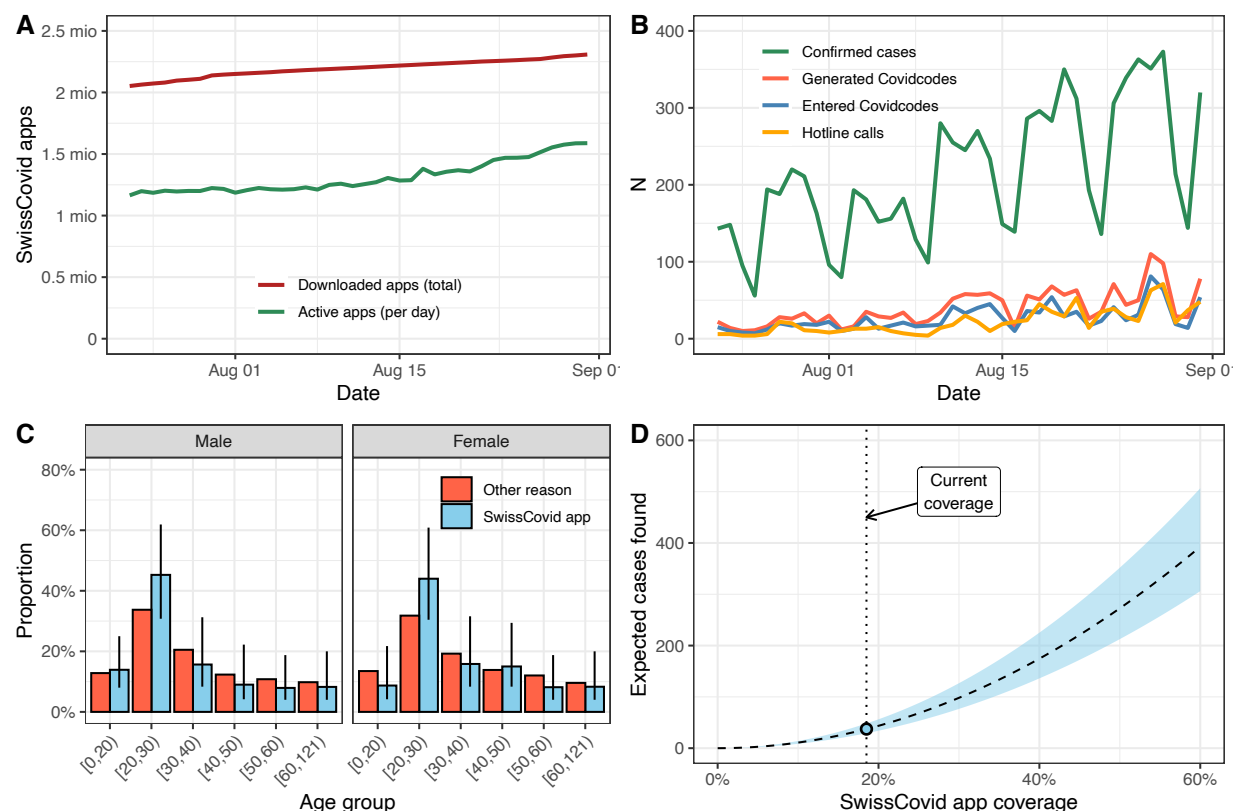

**Figure 2: SwissCovid app measures.** (A) Total number of downloaded apps and daily number of active apps. (B) Daily numbers of confirmed SARS-CoV-2 cases, generated Covidcodes, entered Covidcodes and hotline calls. (C) Age distribution of cases stratified by the reason for RT-PCR test (either SwissCovid app or other reason). (D) Expected number of RT-PCR-confirmed cases that were tested because of a notification by the app as a function of hypothetical app coverage during the study period. Error bars and the blue shaded area correspond to 95% confidence intervals.

## REFERENCES

1. World Health Organization. Coronavirus disease (COVID-19) - Weekly Epidemiological Update. [cited 4 Sep 2020]. Available: [https://www.who.int/docs/default-source/coronaviruse/situation-reports/20200831-weekly-epi-update-3.pdf?sfvrsn=d7032a2a\\_4](https://www.who.int/docs/default-source/coronaviruse/situation-reports/20200831-weekly-epi-update-3.pdf?sfvrsn=d7032a2a_4)
2. Salathé M, Althaus CL, Neher R, Stringhini S, Hodcroft E, Fellay J, et al. COVID-19 epidemic in Switzerland: on the importance of testing, contact tracing and isolation. Swiss Medical Weekly. 2020. doi:<https://doi.org/10.4414/smw.2020.20225>
3. Aleta A, Martin-Corral D, Piontti AP y, Ajelli M, Litvinova M, Chinazzi M, et al. Modeling the impact of social distancing, testing, contact tracing and household quarantine on second-wave scenarios of the COVID-19 epidemic. Medrxiv. 2020; 2020.05.06.20092841. doi:[10.1101/2020.05.06.20092841](https://doi.org/10.1101/2020.05.06.20092841)
4. Kucharski AJ, Klepac P, Conlan AJK, Kissler SM, Tang ML, Fry H, et al. Effectiveness of isolation, testing, contact tracing, and physical distancing on reducing transmission of SARS-CoV-2 in different settings: a mathematical modelling study. Lancet Infect Dis. 2020. doi:[10.1016/s1473-3099\(20\)30457-6](https://doi.org/10.1016/s1473-3099(20)30457-6)
5. Ferretti L, Wymant C, Kendall M, Zhao L, Nurtay A, Abeler-Dörner L, et al. Quantifying SARS-CoV-2 transmission suggests epidemic control with digital contact tracing. Science. 2020;368: eabb6936. doi:[10.1126/science.abb6936](https://doi.org/10.1126/science.abb6936)

6. Troncoso C, Payer M, Hubaux J-P, Salathé M, Larus J, Bugnion E, et al. Decentralized Privacy-Preserving Proximity Tracing. arxiv. 2020. Available: <https://arxiv.org/abs/2005.12273>
7. Wyl V von, Bonhoeffer S, Bugnion E, Salathé M, Stadler T, Troncoso C, et al. A research agenda for digital proximity tracing apps. Swiss Medical Weekly. 2020. doi:<https://doi.org/10.4414/smw.2020.20324>
8. World Health Organization. Ethical considerations to guide the use of digital proximity tracking technologies for COVID-19 contact tracing. [cited 4 Sep 2020]. Available: [https://www.who.int/publications/i/item/WHO-2019-nCoV-Ethics\\_Contact\\_tracing\\_apps-2020.1](https://www.who.int/publications/i/item/WHO-2019-nCoV-Ethics_Contact_tracing_apps-2020.1)
9. Gasser U, Ienca M, Scheibner J, Sleigh J, Vayena E. Digital tools against COVID-19: taxonomy, ethical challenges, and navigation aid. Lancet Digital Heal. 2020;2: e425–e434. doi:10.1016/s2589-7500(20)30137-0
10. Telecommunication SFO of ITS and. SwissCovid Exposure Score Calculation. [cited 4 Sep 2020]. Available: <https://github.com/admin-ch/PT-System-Documents/blob/master/SwissCovid-ExposureScore.pdf>
11. World Health Organization. Contact tracing in the context of COVID-19. [cited 4 Sep 2020]. Available: <https://www.who.int/publications/i/item/contact-tracing-in-the-context-of-covid-19>



12. Wyl V von, Hoeglinger M, Sieber C, Kaufmann M, Moser A, Serra-Burriel M, et al. Are COVID-19 proximity tracing apps working under real-world conditions? Indicator development and assessment of drivers for app (non-)use. medRxiv. 2020. doi:10.1101/2020.08.29.20184382
13. Swiss Federal Office of Statistics. Calculation methods for estimating the number of active SwissCovid apps. [cited 4 Sep 2020]. Available: <https://www.experimental.bfs.admin.ch/bfsstatic/dam/assets/13667538/master>
14. Swiss Federal Office of Statistics. SwissCovid App Monitoring. [cited 4 Sep 2020]. Available: <https://www.experimental.bfs.admin.ch/expstat/en/home/innovative-methods/swisscovid-app-monitoring.html>
15. Corona Immunitas. [cited 4 Sep 2020]. Available: <https://www.corona-immunitas.ch/program>
16. Stringhini S, Wisniak A, Piumatti G, Azman AS, Lauer SA, Baysson H, et al. Seroprevalence of anti-SARS-CoV-2 IgG antibodies in Geneva, Switzerland (SEROCoV-POP): a population-based study. Lancet. 2020;396: 313–319. doi:10.1016/s0140-6736(20)31304-0
17. Zurich Coronavirus Cohort: an observational study to determine long-term clinical outcomes and immune responses after coronavirus infection (COVID-19), assess the influence of virus genetics, and examine the spread of the coronavirus in the population of the Canton of Zurich, Switzerland. [cited 4 Sep 2020]. Available: <http://www.isrctn.com/ISRCTN14990068>
18. White IR, Royston P, Wood AM. Multiple imputation using chained equations: Issues and guidance for practice. Stat Med. 2011;30: 377–399. doi:10.1002/sim.4067

359

360 19. Cheng H-Y, Jian S-W, Liu D-P, Ng T-C, Huang W-T, Lin H-H, et al. Contact Tracing Assessment

361 of COVID-19 Transmission Dynamics in Taiwan and Risk at Different Exposure Periods Before and

362 After Symptom Onset. *Jama Intern Med.* 2020;180. doi:10.1001/jamainternmed.2020.2020

363

364 20. Park YJ, Choe YJ, Park O, Park SY, Kim Y-M, Kim J, et al. Contact Tracing during Coronavirus

365 Disease Outbreak, South Korea, 2020. *Emerging Infectious Diseases.* 2020. doi:DOI:

366 10.3201/eid2610.201315

367

368 21. Abueg M, Hinch R, Wu N, Liu L, Probert WJM, Wu A, et al. Modeling the combined effect of

369 digital exposure notification and non-pharmaceutical interventions on the COVID-19 epidemic in

370 Washington state. *medRxiv.* 2020. doi:10.1101/2020.08.29.20184135

371

372
